# Supplementary material
Source: PubMed Central journal article supplement (PMC9474878)
Supplement: 41422_2021_473_MOESM1_ESM.pdf [file 41422_2021_473_MOESM1_ESM.pdf]

Supplementary Table 1 Primers used in this paper.

| Primer                        | Sequence (5'-3')                                           |
|-------------------------------|------------------------------------------------------------|
| ACE2                          | CAAGAGCAAACGGTTGAACAC<br>CCAGAGCCTCTCATTGTAGTCT            |
| TMPRSS2                       | GCAGTGGTTTCTTTACGCTGT<br>CCGCAAATGCCGTCCAATG               |
| cathepsin L                   | TCGCGTCCTCAAGGCAATC<br>CACAGTTGCGACTGCTTTTCAT              |
| Furin                         | GCAAAGCGACGGACTAAACG<br>TGCCATCGTCCAGAATGGAGA              |
| ISG54                         | CTGCAACCATGAGTGAGAA<br>CCTTTGAGGTGCTTTAGATAG               |
| ISG56                         | TACAGCAACCATGAGTACAA<br>TCAGGTGTTTCACATAGGC                |
| IAV NP-mRNA                   | GACTCACATGATGATCTGGCA<br>CTTGTTCTCCGTCCATTCTCA             |
| IAV NP-vRNA                   | AACGGCTGGTCTGACTCACATGAT<br>AGTGAGCACATCCTGGGATCCATT       |
| Mx1                           | GTTTCCGAAGTGGACATCGCA<br>CTGCACAGGTTGTTCTCAGC              |
| $\beta$ -actin                | CATGTACGTTGCTATCCAGGC<br>CTCCTTAATGTCACGCACGAT             |
| HRSV-M                        | GGAAACATACGTGAACAAGCTTCA<br>TCATCATCTTTTTCTAGAACATTGTACTGA |
| HRV3-5' UTR(position 456~569) | GGCCCCTGAATGYGGCTAA<br>GAAACACGGACACCCAAAGTAG              |
| HPIV-M                        | AGAAGAACAGTCAAAGCGAAAG<br>CTCCAATAATCCCAAAG                |
| ACE2-sgRNA1                   | CACCGGCCTCCATCGATATTAGCAAAGG                               |
| ACE2-sgRNA2                   | CACCGTACCAAGCAAATGAGCAGGGAGG                               |
| Taqman probe                  |                                                            |
| SARS2-E                       | ACACTAGCCATCCTTACTGCGCTTCG                                 |
| SARS2-N                       | GCAAATTGTGCAATTTGCGG                                       |
| GAPDH                         | CTGCTTAGCACCCCTGGCCA                                       |
