# Supplementary material
Source: PubMed Central journal article supplement (PMC9474878)
Supplement: 41422_2021_473_MOESM2_ESM.pdf [file 41422_2021_473_MOESM2_ESM.pdf]

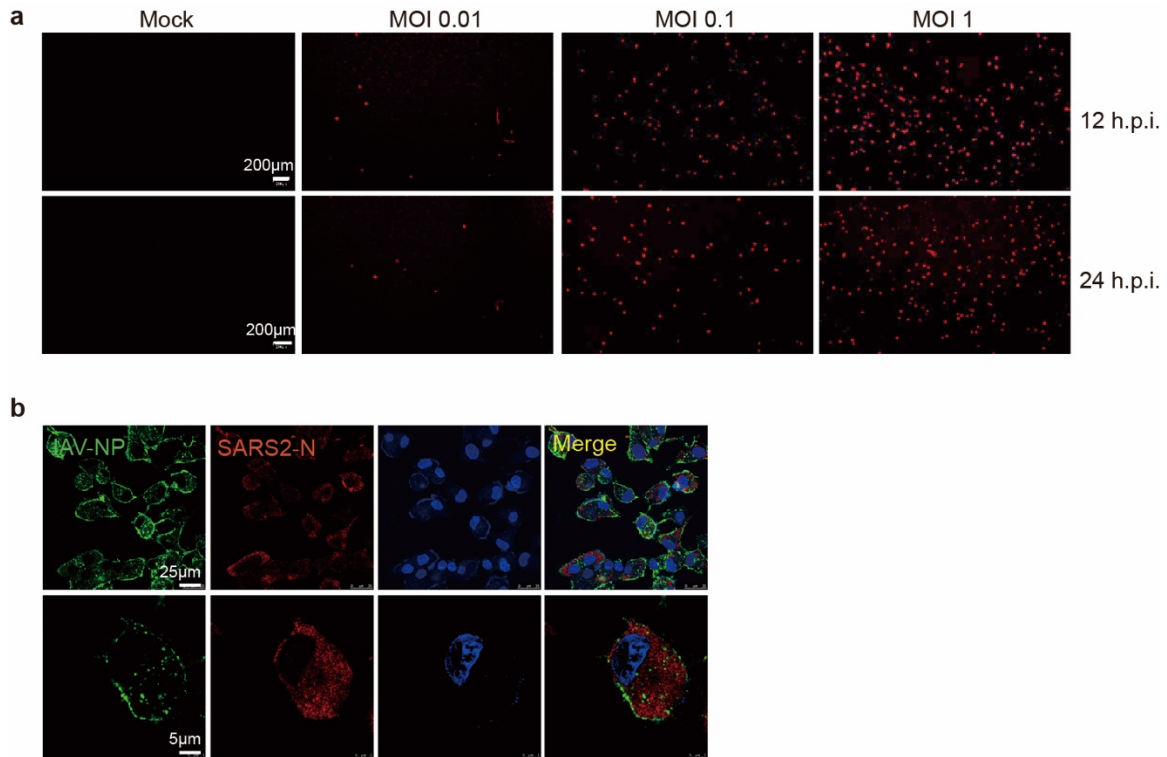

**Fig. S1. IAV and SARS-CoV-2 colocalized at the same cell (related to Fig. 1).**

(a) A549 cells were infected with A/WSN/33 at the indicated MOIs. At 12 and 24 h post-IAV infection, cells were infected with pseudo-SARS-CoV-2 tagged with an mCherry reporter for another 24 h. Scale bars, 200 μm. (b) A549 cells were infected with WSN at an MOI of 0.1 for 12 h and then infected with live SARS-CoV-2 for another 48 h. IAV NP protein (green) and SARS-CoV-2 N (red) were detected using immunofluorescence assay by confocal microscope. Scale bars are shown.
