# Supplementary material
Source: PubMed Central journal article supplement (PMC9474878)
Supplement: 41422_2021_473_MOESM3_ESM.pdf [file 41422_2021_473_MOESM3_ESM.pdf]

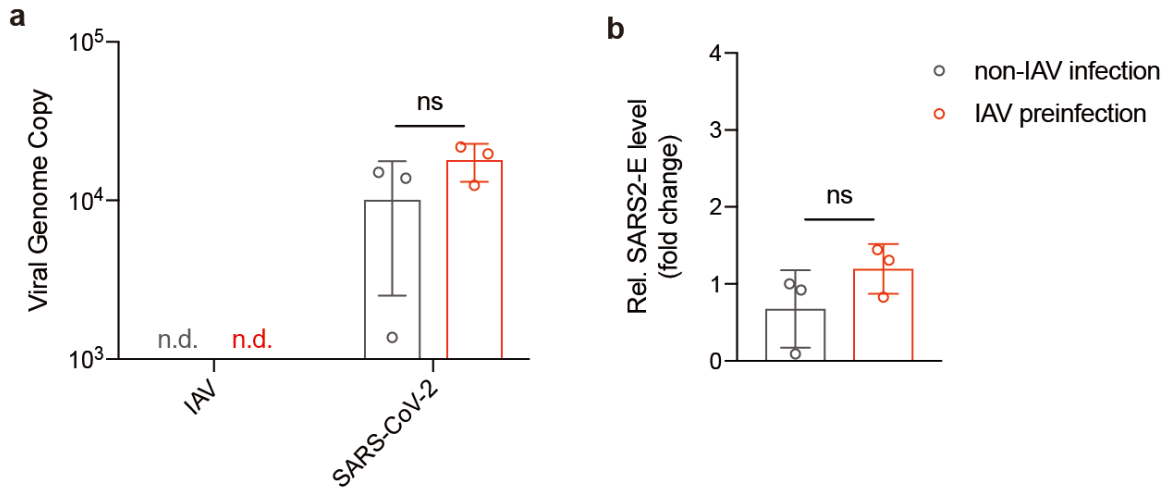

**Fig. S2. The SARS-CoV-2 infection in mice brain was not enhanced by IAV preinfection.** The absolute (a) and relative (b) mRNA levels of IAV NP and SARS-CoV-2 E genes were measured from brain homogenates in the indicated groups. The data are expressed as fold changes relative to the non-IAV infection control. n.d. means not detectable. Values represent means  $\pm$  SD of three individual mice. ns,  $P \geq 0.05$ .
