# Supplementary material
Source: PubMed Central journal article supplement (PMC9474878)
Supplement: 41422_2021_473_MOESM4_ESM.pdf [file 41422_2021_473_MOESM4_ESM.pdf]

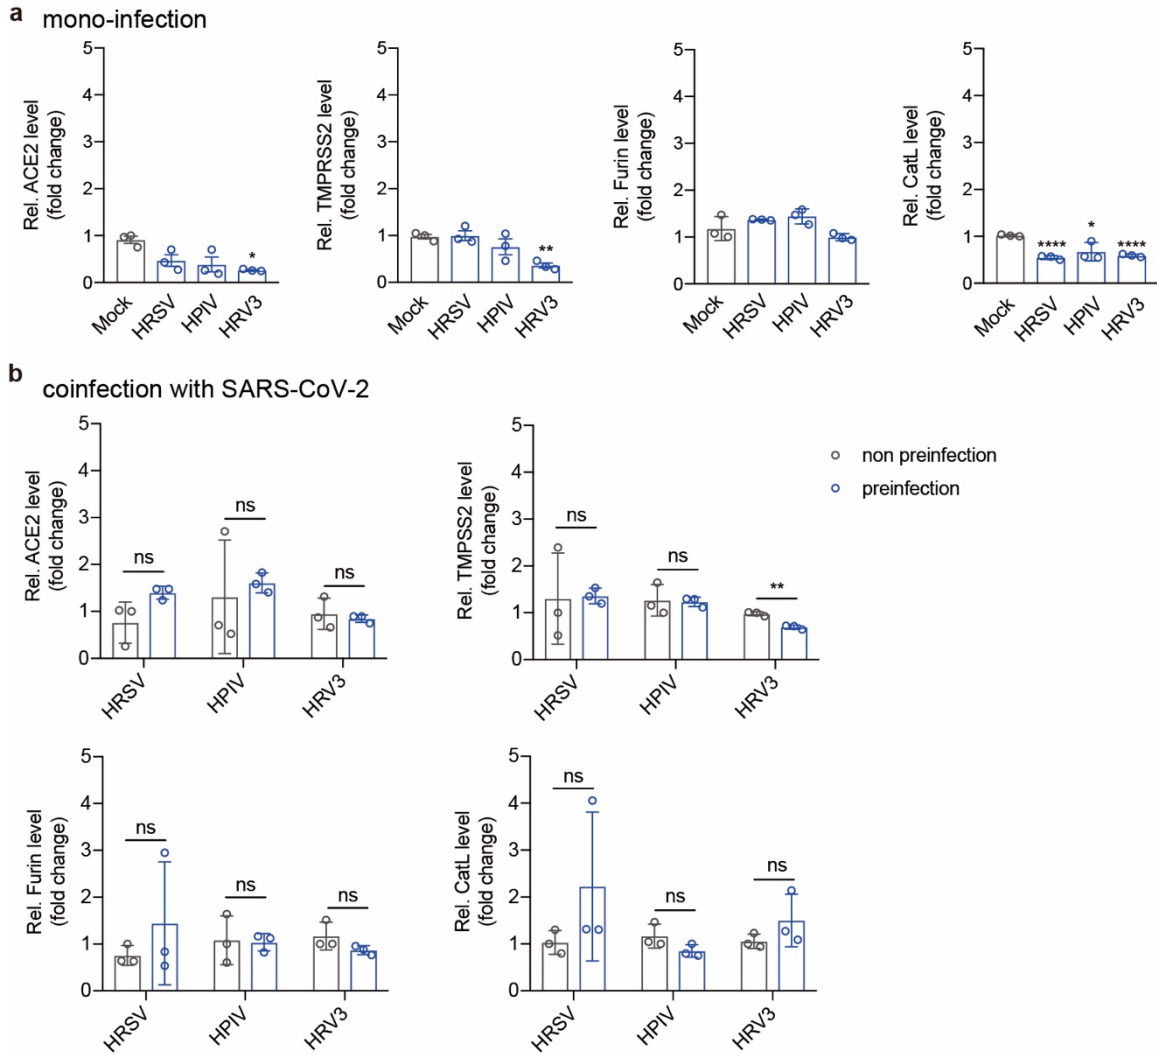

**Fig. S3. The SARS-CoV-2 receptor and co-factor expressions (related to Fig. 3).** The mRNA levels of ACE2, TMPRSS2, Furin, and Cat L were detected by qRT-PCR at 12 h after HRSV, HPIV, or HRV3 infection (**a**) or at 60 h after coinfection with SARS-CoV-2 (**b**). The data are expressed as the fold changes relative to the mock infection (**a**) or non-preinfection (**b**) controls. Values represent means  $\pm$  SD of three independent experiments.

\* $P < 0.05$ , \*\* $P < 0.01$ , \*\*\* $P < 0.001$ , \*\*\*\* $P < 0.0001$ .
