# Supplementary material
Source: PubMed Central journal article supplement (PMC9474878)
Supplement: 41422_2021_473_MOESM5_ESM.pdf [file 41422_2021_473_MOESM5_ESM.pdf]

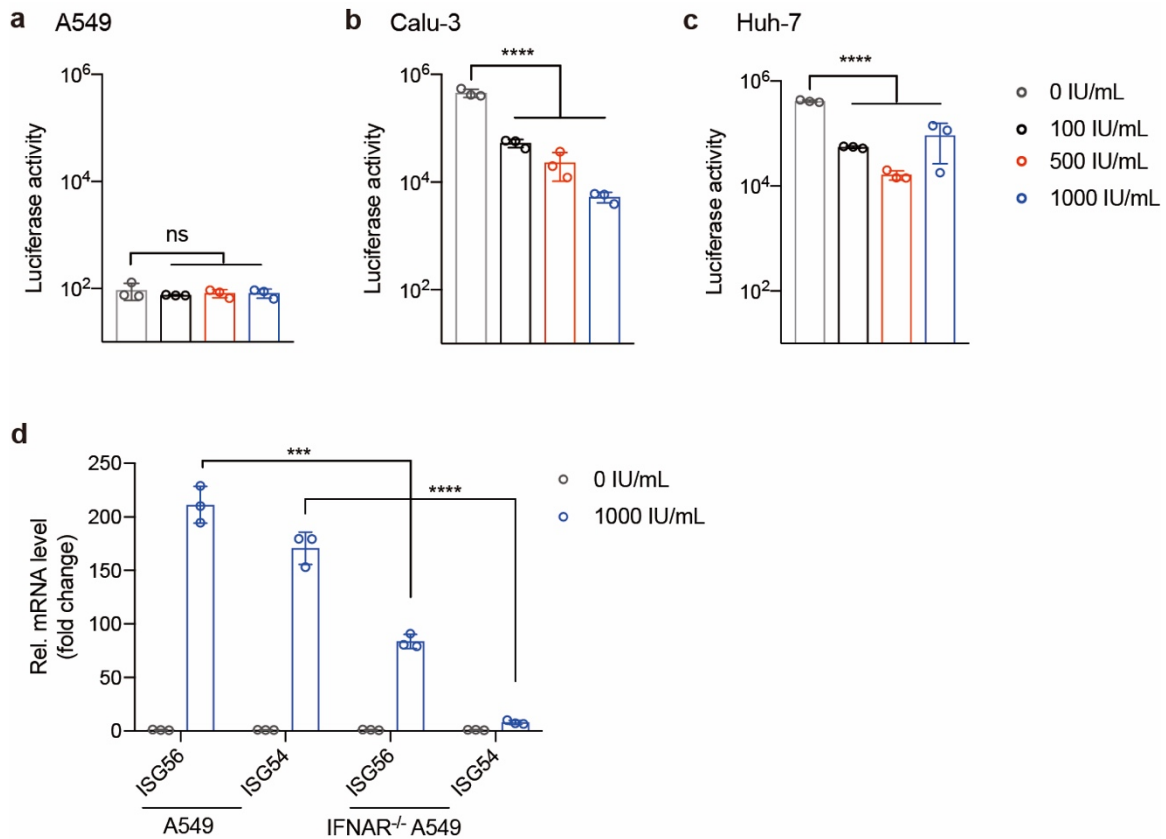

**Fig. S4. Enhanced SARS-CoV-2 infection is independent of IFN signaling (related to Fig. 5).**

A549 (a), Calu-3 (b), and Huh-7 (c) cells were pretreated with the indicated doses of IFN $\gamma$  for 12 h. Cells were then infected with pseudo-SARS-CoV-2 for another 24 h, followed by measurement of luciferase activity. (d) WT and IFNAR<sup>-/-</sup> A549 cells were treated with IFN $\alpha$  at 1000 IU/mL for 12 h, and the mRNA expression levels of the indicated genes were measured. Values represent means  $\pm$  SD of three independent experiments. (a-c) The *P* values are from unpaired one-way ANOVA. \**P*<0.05, \*\**P*<0.01, \*\*\**P*<0.001, \*\*\*\**P*<0.0001.
